# Supplementary material for: Analysis of Microbiota and Mycobiota in Fungal Ball Rhinosinusitis: Specific Interaction between Aspergillus fumigatus and Haemophilus influenza?
Source: MDPI journal article supplement (doi:10.3390/jof7070550), 2021-07-10

**Table S1.** Operative taxonomic units (OTUs) assigned to *Haemophilus*, *Pseudomonas*, *Staphylococcus*, *Streptococcus* and *Aspergillus* identified to the species level. Data presented in total read count and relative abundance among the genus.

|                                              | Reads count | (%)   |
|----------------------------------------------|-------------|-------|
| <i>Haemophilus</i>                           | 482,366     | 100   |
| <i>H. influenzae</i>                         | 416,443     | 86.3  |
| <i>Haemophilus</i> sp.                       | 65,923      | 13.6  |
| <i>Pseudomonas</i>                           | 185,542     | 100   |
| <i>P. aeruginosa</i>                         | 106,977     | 57.7  |
| <i>P. mosselii</i>                           | 43,574      | 23.4  |
| <i>P. migulae</i>                            | 29,039      | 15.6  |
| <i>P. synxantha</i>                          | 3,206       | 1.7   |
| <i>Pseudomonas</i> sp.                       | 2,746       | 1.7   |
| <i>Staphylococcus</i>                        | 202,784     | 100   |
| <i>S. aureus</i>                             | 186,534     | 91.9  |
| <i>S. lugdunensis</i>                        | 6,994       | 3.4   |
| <i>S. carnosus</i>                           | 4,860       | 2.4   |
| <i>S. epidermidis</i>                        | 4,229       | 2.1   |
| <i>S. caprae</i>                             | 175         | 0.08  |
| <i>S. saprophyticus</i>                      | 27          | <0,01 |
| <i>Staphylococcus</i> sp.                    | 15          | <0,01 |
| <i>Streptococcus</i>                         | 69,020      | 100   |
| <i>S. intermedius</i>                        | 36,994      | 53.6  |
| <i>S. pneumoniae</i>                         | 17,766      | 25.7  |
| <i>S. constellatus</i>                       | 14,144      | 20.5  |
| <i>S. sanguinis</i>                          | 60          | 0.1   |
| <i>S. dysgalactiae</i>                       | 46          | 0.1   |
| <i>Streptococcus</i> sp.                     | 10          | <0.01 |
| <i>Aspergillus</i>                           | 1,075,193   | 100   |
| <i>Aspergillus</i> section <i>Fumigati</i>   | 868,848     | 80.8  |
| <i>Aspergillus</i> section <i>Flavi</i>      | 165,693     | 15.4  |
| <i>Aspergillus</i> section <i>Nidulantes</i> | 40,365      | 3.7   |
| <i>Aspergillus</i> sp.                       | 287         | 0.03  |

**Figure S1.** Fungal richness and diversity calculated based on ITS1 and ITS2. Alpha, inverse Simpson, Shannon and Simpson are displayed.

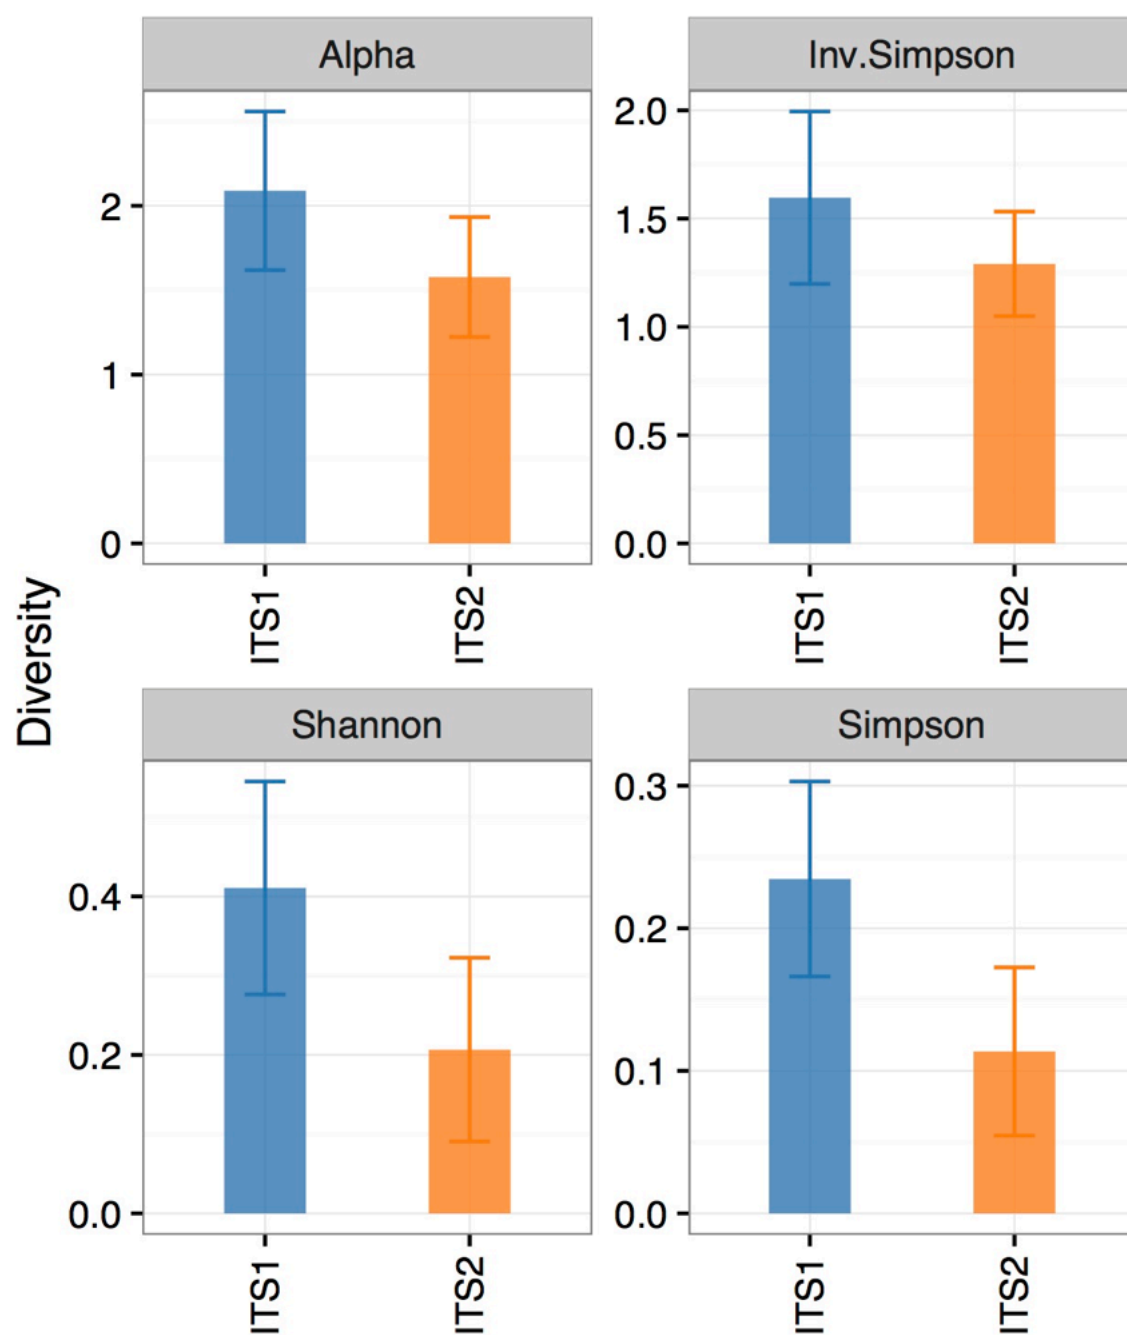

**Figure S2:** Heatmap of the relative abundance of major\* (A) bacterial and (B) fungal taxa among the 45 samples analysed through 16S and ITS2 targeted metagenomic analysis respectively.

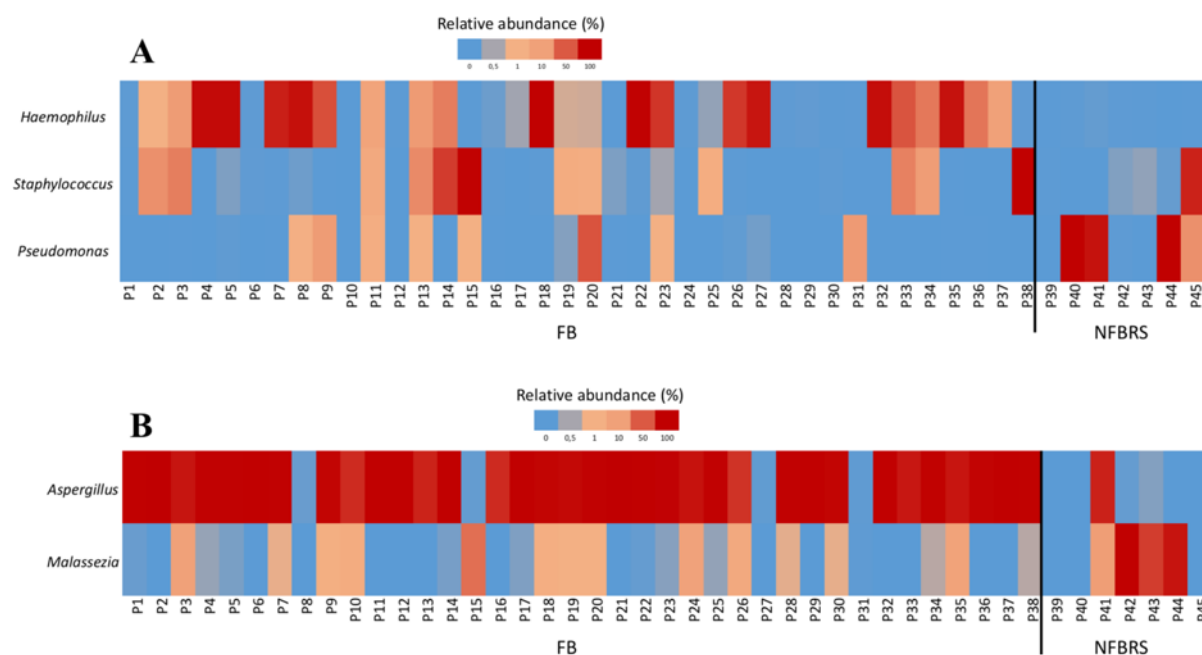

\*major bacterial and fungal taxa were considered if taxa was >1% relative abundance in >25% samples. FB: fungal balls; NFBRs: Non-fungal ball rhinosinusitis

**Figure S3.** Bacterial diversity represented in number of reads and relative abundance for all taxa found

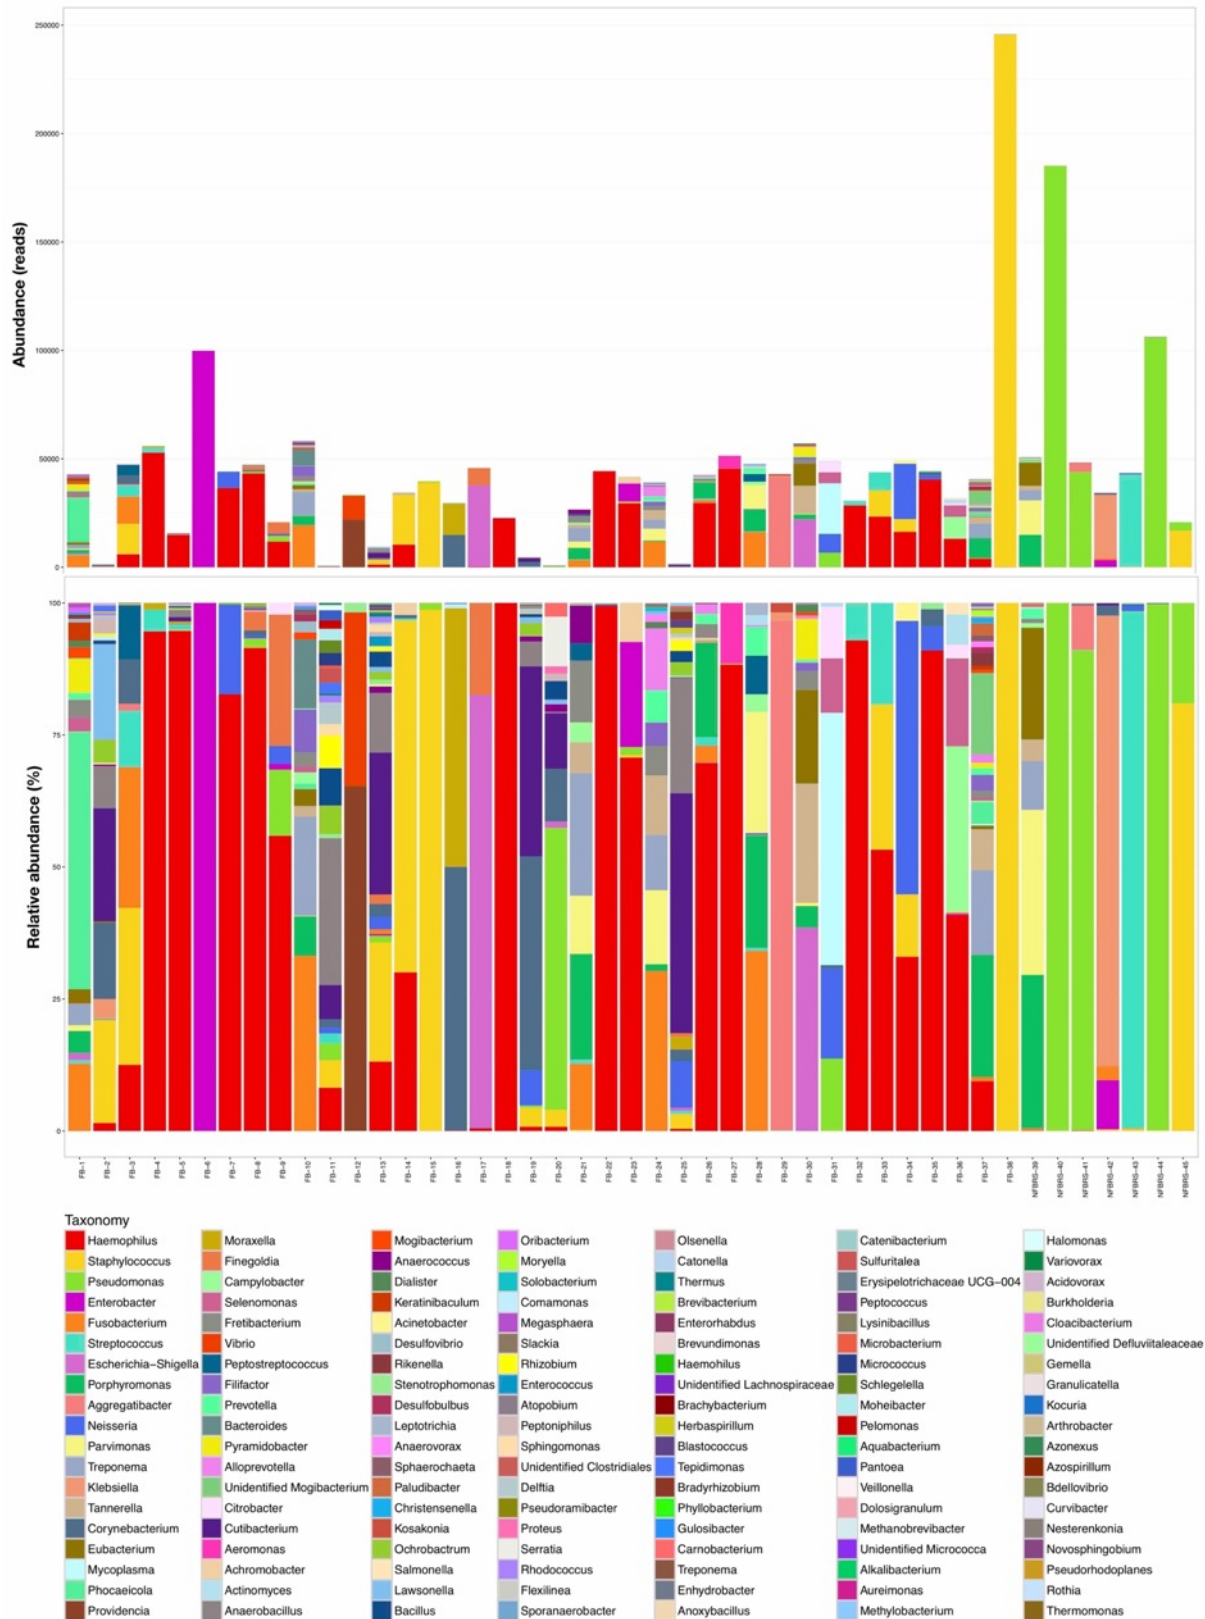

**Figure S4.** Fungal diversity represented in number of reads and relative abundance for all taxa found

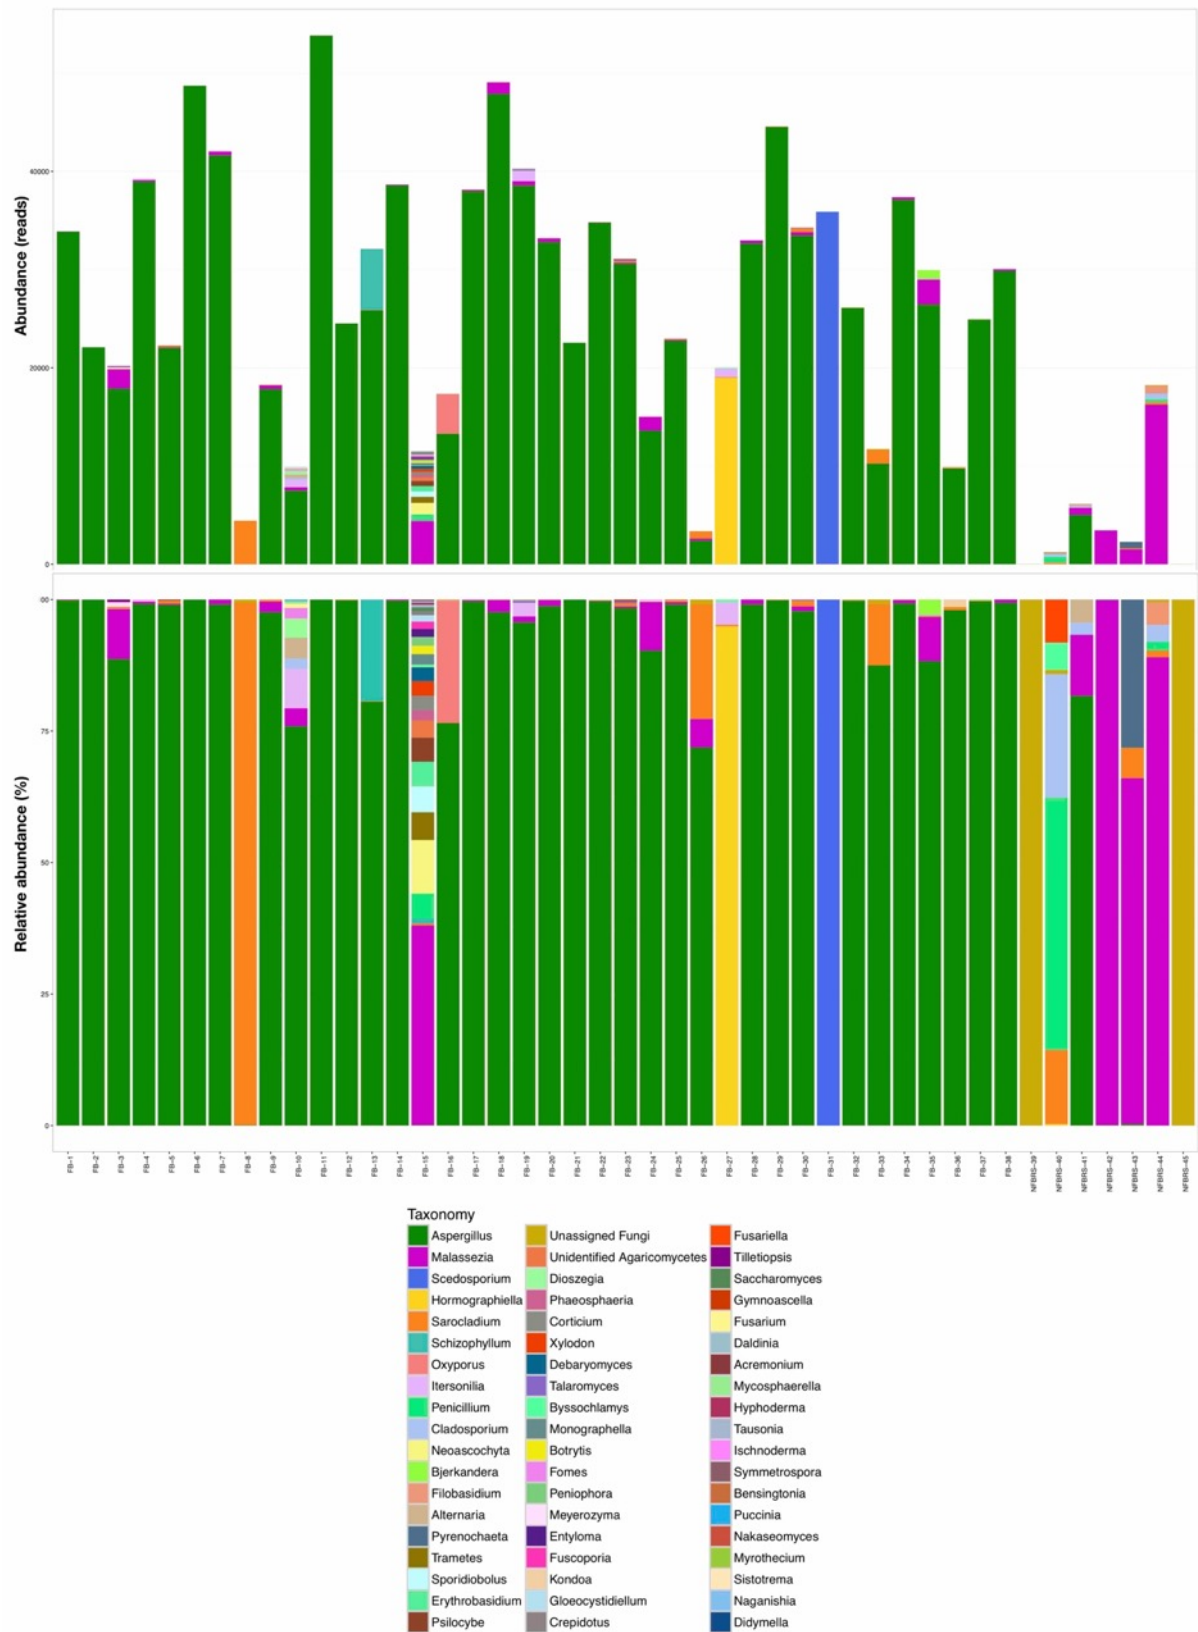

Supplement: s1 [file s1]
